# Supplementary material for: Kinetic analysis of the translocator protein positron emission tomography ligand [18F]GE-180 in the human brain
Source: Springer Nature journal article supplement (doi:10.1007/s00259-016-3444-z), 2016-06-27
Supplement: MOESM1 [file 259_2016_3444_MOESM1_ESM.pdf]

Supplementary Table 1. Subject demographics. HAB=high affinity TSPO binders and MAB=mixed affinity TSPO binders

| Subject | Genotype | Age (yrs) | Gender | Weight (kg) |
|---------|----------|-----------|--------|-------------|
| 1       | HAB      | 47.9      | M      | 97.9        |
| 2       | HAB      | 35.5      | M      | 72.1        |
| 3       | HAB      | 34.4      | M      | 94.6        |
| 4       | HAB      | 48.1      | F      | 69.7        |
| 5       | HAB      | 28.4      | M      | 96.6        |
| 6       | MAB      | 49.2      | M      | 87.5        |
| 7       | MAB      | 39.8      | F      | 70.3        |
| 8       | MAB      | 31.0      | F      | 74.2        |
| 9       | MAB      | 56.2      | M      | 65.4        |
| 10      | MAB      | 39.7      | M      | 90.4        |
